# Supplementary material
Source: PubMed Central journal article supplement (PMC5834678)
Supplement: pnas.201713301SI.pdf [file pnas.201713301SI.pdf]

# Supporting Information

Giardino Torchia et al. 10.1073/pnas.1713301115

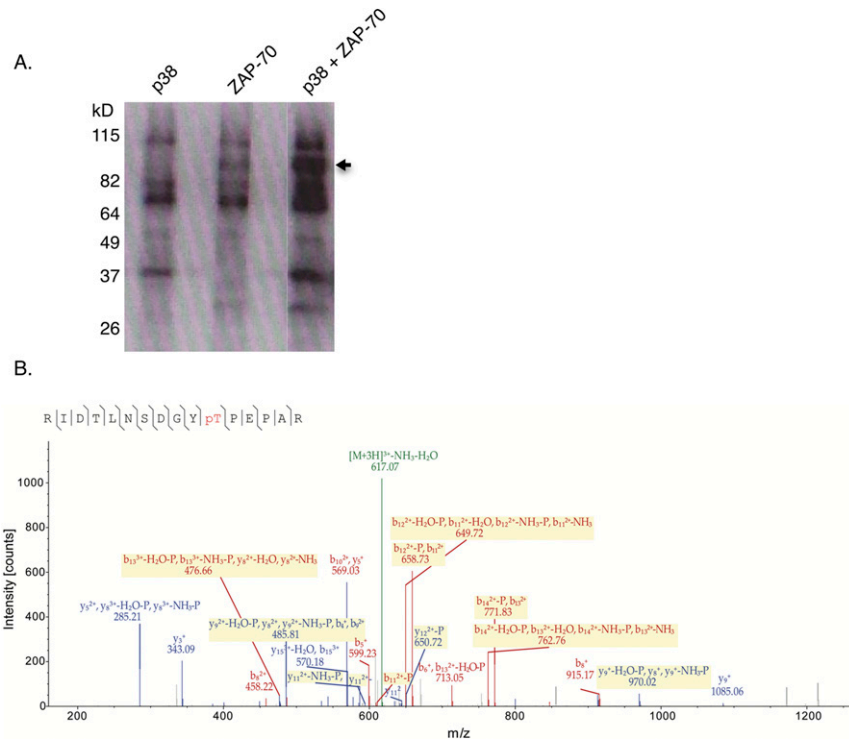

**Fig. S1.** (A) Human recombinant GST-ZAP-70 was incubated with or without murine His-tagged p38 $\alpha$  alone in kinase buffer containing [ $\gamma$ - $^{32}$ P]-ATP. After electrophoresis the radioactive bands were visualized using a Phosphorimager. The arrow indicates the  $\sim$ 95-kDa band corresponding to GST-ZAP-70. (B) Tandem mass spectrum of the peptide RIDTLNSDGYTPEPAR from GST-ZAP-70, corresponding to residues 283–298. The identified b (red) and y (blue) ions are denoted in the spectrum; unfragmented precursor peptide is shown in green. The ions showing a loss of phosphate are highlighted in yellow. The peptide sequence and matched ions are provided above the spectrum.

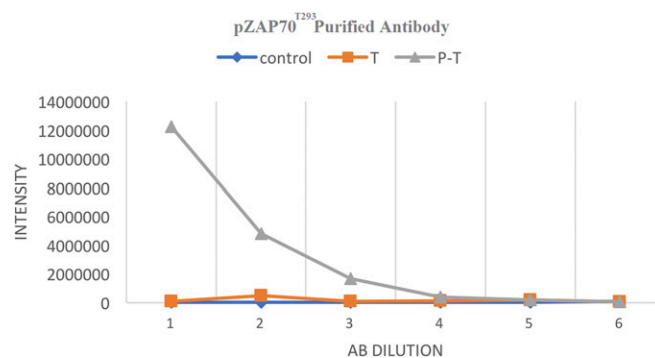

**Fig. S2.** Serial dilutions of the phospho-peptide-purified anti-pZAP-70<sup>T293</sup> polyclonal rabbit antibody were tested against unphosphorylated or the phosphorylated peptide for reactivity by ELISA. The wells were coated with: control, sodium carbonate buffer; T, unphosphorylated peptide; P-T, immunizing phospho-peptide, NSDGY-pT-PEPAC.
